# Supplementary material
Source: publisher figshare collection journal article supplement (https://gsapubs.figshare.com/ndownloader/files/26855465)
Supplement: Supplementary file 1 [file 26855465]

## Sheet: Sheet1
Table S6. Zircon Hf-O isotopic data of the granitic rocks from the southeastern Fujian, coastal area of SE China.
Sample	Age	176Yb/177Hf	176Lu/177Hf	176Hf/177Hf	2σ	176Hf/177Hfi	eHf(i)	2σ	TDM(Hf)	fLu/Hf	δ18O	2σ
08JH285 01	97	0.0505031	0.00175417	0.282762	2.46214e-05	0.282759	1.65299	0.870899	708.944	-0.947164	5.59054	0.196114
08JH285 02	97	0.0576021	0.00197764	0.282751	2.76126e-05	0.282747	1.25108	0.976705	729.163	-0.940433	5.2327	0.250366
08JH285 03	97	0.0511563	0.00188379	0.282698	1.28558e-05	0.282694	-0.620536	0.454731	804.058	-0.943259	5.04143	0.25468
08JH285 04	97	0.0207267	0.000722779	0.282671	2.25119e-05	0.28267	-1.47749	0.796285	816.34	-0.97823	4.84389	0.211057
08JH285 05	97	0.0324523	0.0013056	0.28275	1.69077e-05	0.282748	1.28075	0.598056	716.581	-0.960675	4.39641	0.216104
08JH285 06	97	0.0313967	0.00108911	0.282704	2.45358e-05	0.282702	-0.345044	0.867873	778.077	-0.967196	4.74761	0.179687
08JH285 07	97	0.044997	0.00160712	0.282742	2.16391e-05	0.282739	0.963285	0.765414	734.518	-0.951593	5.01505	0.244874
08JH285 08	97	0.0476458	0.00195799	0.282706	2.02625e-05	0.282703	-0.329262	0.716717	793.565	-0.941024	4.52679	0.207139
08JH285 09	97	0.0483869	0.00170893	0.282742	1.80816e-05	0.282739	0.960092	0.639576	736.407	-0.948526	5.3354	0.308718
08JH285 10	97	0.0306678	0.00107272	0.282767	2.47576e-05	0.282765	1.88593	0.875719	688.506	-0.967689	4.60776	0.23328
08JH285 11	97	0.0409104	0.00141165	0.282752	2.37861e-05	0.282749	1.33062	0.841355	716.333	-0.95748	4.74756	0.206562
08JH285 12	97	0.0280122	0.00100073	0.282768	2.30208e-05	0.282766	1.93141	0.814284	685.556	-0.969858	4.91161	0.266466
08JH285 13	97	0.0398626	0.00137554	0.282689	2.13389e-05	0.282687	-0.881055	0.754792	804.912	-0.958568	4.53441	0.193173
08JH285 14	97	0.0503422	0.00172442	0.282738	2.59657e-05	0.282735	0.825923	0.918452	742.139	-0.94806	5.50167	0.22931
08JH285 15	97	0.0369025	0.00127691	0.282714	2.12875e-05	0.282711	-0.0218346	0.752976	768.506	-0.961539	5.33292	0.24532
08JH285 16	97	0.0413746	0.0013903	0.282657	2.15675e-05	0.282655	-2.02537	0.762879	851.294	-0.958124	5.05982	0.195913
08JH285 17	97	0.059537	0.002027	0.282788	2.24101e-05	0.282784	2.55799	0.792682	676.317	-0.938946	4.94257	0.235737
08JH285 18	97	0.0519663	0.00183639	0.282714	2.06214e-05	0.28271	-0.0472534	0.729414	779.754	-0.944687	4.48751	0.216873
08JH253 01	95	0.0483235	0.00177962	0.282776	1.67742e-05	0.282773	2.11739	0.59333	688.715	-0.946397	5.23296	0.176968
08JH253 02	95	0.0421742	0.00177814	0.282722	1.49125e-05	0.282719	0.221771	0.527479	766.016	-0.946442	4.48972	0.20786
08JH253 03	95	0.0256698	0.00105475	0.282711	1.44197e-05	0.282709	-0.133544	0.510047	767.302	-0.96823	4.56173	0.195077
08JH253 03-1	95	0.0246982	0.0010077	0.282721	1.3176e-05	0.282719	0.208789	0.466054	752.793	-0.969648	5.07492	0.249362
08JH253 04	95	0.0339713	0.00138037	0.282716	1.51531e-05	0.282713	0.00460657	0.53599	767.607	-0.958423	5.15131	0.339935
08JH253 05	95	0.048746	0.00199375	0.282753	1.32893e-05	0.282749	1.28512	0.470064	726.35	-0.939947	5.20281	0.256516
08JH253 06	95	0.0241569	0.00102032	0.282704	1.53255e-05	0.282702	-0.400131	0.542088	777.331	-0.969268	5.16166	0.207239
08JH253 07	95	0.0590571	0.0020393	0.282796	1.64601e-05	0.282793	2.81198	0.582221	664.369	-0.938575	4.5506	0.375946
08JH253 08	95	0.0434138	0.00179689	0.282709	1.448e-05	0.282706	-0.242037	0.51218	785.269	-0.945877	5.33547	0.24428
08JH253 10	95	0.0525449	0.00202271	0.282736	1.6977e-05	0.282732	0.67566	0.600504	751.871	-0.939075	5.90296	0.180281
08JH253 11	95	0.0769732	0.00296297	0.282729	1.21151e-05	0.282724	0.390151	0.428531	781.216	-0.910754	5.05269	0.221128
08JH253 12	95	0.0333113	0.00136007	0.28267	1.59408e-05	0.282668	-1.59339	0.563851	831.603	-0.959034	5.77888	0.299901
08JH253 13	95	0.0285127	0.0011882	0.282691	1.38569e-05	0.282689	-0.843511	0.490141	798.168	-0.964211	5.31963	0.246491
08JH253 14	95	0.0347976	0.00140739	0.282705	1.35804e-05	0.282702	-0.380592	0.480361	783.637	-0.957609	5.30097	0.203341
08JH253 15	95	0.043661	0.00173637	0.282705	1.20992e-05	0.282702	-0.392699	0.427968	790.269	-0.9477	4.60812	0.356429
08JH253 16	95	0.0599124	0.00236985	0.282725	3.47587e-05	0.282721	0.276946	1.22947	774.68	-0.928619	4.34271	0.225398
08JH253 16-1	95	0.0464671	0.00187837	0.282733	1.93953e-05	0.28273	0.584805	0.686043	753.006	-0.943423
08JH253 17-1	95	0.159311	0.00460722	0.282677	2.36769e-05	0.282669	-1.56421	0.837489	900.566	-0.861228	5.50808	0.243727
08JH247 01	96	0.0556143	0.00216688	0.282718	1.42832e-05	0.282714	0.0461918	0.50522	781.247	-0.934733	4.72795	0.289487
08JH247 02	96	0.0537201	0.00202748	0.282786	2.26227e-05	0.282783	2.48446	0.800203	678.499	-0.938931	4.79374	0.248371
08JH247 03	96	0.0374788	0.00155715	0.282728	1.5611e-05	0.282726	0.467087	0.552186	752.923	-0.953098	4.61598	0.274229
08JH247 04	96	0.0503598	0.00204679	0.282725	1.98837e-05	0.282722	0.328155	0.70332	767.421	-0.93835	4.83593	0.245576
08JH247 05	96	0.0289008	0.00119446	0.282728	1.61909e-05	0.282725	0.461421	0.572698	746.785	-0.964022	4.70541	0.23242
08JH247 06	96	0.0668286	0.00261719	0.282744	1.71321e-05	0.28274	0.957196	0.605991	751.814	-0.921169	4.8611	0.202838
08JH247 07	96	0.0551553	0.002109	0.282717	1.30779e-05	0.282713	0.035481	0.462587	780.602	-0.936476	4.8611	0.250491
08JH247 08	96	0.0498921	0.00206806	0.28275	1.51619e-05	0.282746	1.20135	0.536302	731.925	-0.937709	5.01106	0.18934
08JH247 11	96	0.0858082	0.00322206	0.282773	1.98933e-05	0.282767	1.94434	0.703658	721.113	-0.90295	5.11684	0.256142
08JH247 12	96	0.0486116	0.00192109	0.282715	2.40552e-05	0.282712	-0.0177319	0.850871	779.275	-0.942136	4.72113	0.277712
08JH247 14	96	0.0578718	0.00224307	0.282799	2.7397e-05	0.282795	2.91516	0.969077	664.141	-0.932438	4.83707	0.224222
08JH247 16-1	96	0.0681884	0.00265907	0.282779	1.98612e-05	0.282774	2.1897	0.702522	701.063	-0.919907	4.91776	0.246775
08JH247 17	96	0.0456825	0.00182491	0.282717	2.36139e-05	0.282714	0.0469624	0.835264	774.849	-0.945033	5.26984	0.273357
08JH247 18-1	96	0.0863576	0.00334089	0.282802	3.31805e-05	0.282796	2.95165	1.17365	680.278	-0.899371	4.69234	0.139736
08JH247 18-2	96	0.0377454	0.0015434	0.282732	2.13639e-05	0.28273	0.60888	0.755675	746.935	-0.953512	4.87963	0.181514
08JH249 01	98	0.0652294	0.00253991	0.282747	1.7249e-05	0.282742	1.10384	0.7	746.704	-0.923497
08JH249 02	98	0.0424766	0.00163352	0.282757	2.37059e-05	0.282753	1.49981	0.7	714.698	-0.950798
08JH249 03	98	0.055366	0.00214705	0.282727	2.07645e-05	0.282723	0.418607	0.7	767.968	-0.93533
08JH249 04	98	0.0496804	0.00202933	0.28272	2.3246e-05	0.282716	0.186102	0.7	775.365	-0.938876
08JH249 05	98	0.0559951	0.0021407	0.282709	1.95411e-05	0.282705	-0.222301	0.7	794.258	-0.935521
08JH249 06	98	0.0509548	0.00198715	0.282718	2.56746e-05	0.282714	0.0953736	0.7	778.308	-0.940146
08JH249 07	98	0.0393621	0.00152512	0.282702	2.02966e-05	0.282699	-0.417799	0.7	790.629	-0.954063
08JH249 08	98	0.0624182	0.00239844	0.282712	2.60669e-05	0.282707	-0.123594	0.7	795.116	-0.927758
08JH249 09	98	0.0404405	0.00156238	0.282702	2.37696e-05	0.282699	-0.425298	0.7	791.629	-0.95294
08JH249 10	98	0.0515724	0.00197484	0.282703	2.42271e-05	0.282699	-0.435822	0.7	799.863	-0.940517
08JH249 12	98	0.0740106	0.00277172	0.282705	2.52743e-05	0.2827	-0.402186	0.7	814.047	-0.916514
08JH249 13	98	0.0361335	0.00143269	0.282675	2.48371e-05	0.282672	-1.37131	0.7	827.423	-0.956847
08JH249 14	98	0.0495293	0.00187195	0.282723	2.14504e-05	0.282719	0.278814	0.7	768.673	-0.943616
08JH249 15	98	0.0530371	0.00210477	0.282723	2.10976e-05	0.282718	0.261774	0.7	773.649	-0.936603
08JH249 16	98	0.0504878	0.00198307	0.282666	2.20621e-05	0.282662	-1.72055	0.7	852.681	-0.940269
08JH249 17	98	0.0506204	0.00205298	0.282715	2.84406e-05	0.282711	-0.014653	0.7	784.055	-0.938163
08JH249 18	98	0.0621068	0.00227214	0.28269	2.25842e-05	0.282686	-0.895318	0.7	824.59	-0.931562
08JH249 19	98	0.0561952	0.00215778	0.282704	2.86238e-05	0.282699	-0.40698	0.7	802.195	-0.935007
08JH249 20	98	0.0505102	0.00209092	0.282726	2.99787e-05	0.282722	0.379553	0.7	768.546	-0.93702
08JH249 21	98	0.0419065	0.0016185	0.282712	2.36955e-05	0.282708	-0.0955987	0.7	779.29	-0.95125
08JH249 22	98	0.0443894	0.00181398	0.28273	2.37863e-05	0.282726	0.534083	0.7	757.189	-0.945362
08JH249 23	98	0.0466808	0.0017699	0.282714	2.07027e-05	0.282711	-0.0157334	0.7	778.831	-0.94669
08JH249 23	98	0.0406076	0.00156801	0.28262	2.36984e-05	0.282617	-3.32242	0.7	909.093	-0.952771
08JH251 01	98	0.0722639	0.00296279	0.282736	1.70955e-05	0.282727	0.697231	0.7	771.545	-0.910759
08JH251 02	98	0.0296007	0.00116692	0.28274	1.58603e-05	0.282737	0.924542	0.7	730.123	-0.964852
08JH251 03	98	0.0414264	0.00172029	0.282725	2.06181e-05	0.282722	0.374036	0.7	762.037	-0.948184
08JH251 04	98	0.0402106	0.00162844	0.282732	1.6934e-05	0.282729	0.62881	0.7	750.033	-0.950951
08JH251 05	98	0.0347153	0.00137605	0.282717	1.55528e-05	0.282714	0.0993537	0.7	766.989	-0.958553
08JH251 06	98	0.0643631	0.00266491	0.282721	1.76716e-05	0.282716	0.168023	0.7	788.091	-0.919732
08JH251 07	98	0.0265721	0.00110295	0.282733	1.81799e-05	0.282731	0.707709	0.7	737.738	-0.966779
08JH251 08	98	0.0430676	0.00173657	0.282769	1.83913e-05	0.282766	1.9347	0.7	698.677	-0.947694
08JH251 09	98	0.0660029	0.00270946	0.282724	2.06946e-05	0.282719	0.272857	0.7	784.56	-0.91839
08JH251 10	98	0.0421977	0.00158185	0.282723	1.95306e-05	0.28272	0.319423	0.7	761.772	-0.952354
08JH251 11	98	0.0657799	0.00265003	0.282755	1.83544e-05	0.28275	1.36326	0.7	737.841	-0.92018
08JH289 01	97	0.0449026	0.00202774	0.282723	1.85027e-05	0.282719	0.268235	0.7	771.115	-0.938924
08JH289 02	97	0.0382236	0.00151334	0.28271	2.35585e-05	0.282707	-0.169629	0.7	779.51	-0.954418
08JH289 03	97	0.0483861	0.0021465	0.282734	1.50522e-05	0.28273	0.659564	0.7	757.179	-0.935346
08JH289 04	97	0.0326092	0.00134672	0.282722	1.97392e-05	0.282719	0.260756	0.7	759.103	-0.959436
08JH289 05	97	0.0316504	0.00132013	0.282741	1.83677e-05	0.282739	0.952757	0.7	730.732	-0.960237
08JH289 06	97	0.0371369	0.0014858	0.282687	1.70876e-05	0.282684	-0.962752	0.7	811.094	-0.955247
08JH289 07	97	0.0425845	0.00184109	0.282718	2.0076e-05	0.282714	0.0866149	0.7	775.118	-0.944546
08JH289 08	97	0.0341608	0.00137994	0.282739	2.55947e-05	0.282736	0.853603	0.7	735.754	-0.958436
08JH289 09	97	0.0290364	0.00119451	0.282707	2.4395e-05	0.282704	-0.263139	0.7	777.453	-0.964021
08JH289 10	97	0.0422391	0.00165866	0.282697	2.00782e-05	0.282694	-0.621018	0.7	800.543	-0.95004
08JH289 11	97	0.0332877	0.00137906	0.282711	1.74723e-05	0.282708	-0.130546	0.7	775.473	-0.958462
08JH289 12	97	0.0315458	0.0013247	0.282692	2.51498e-05	0.282689	-0.791441	0.7	801.112	-0.9601
08JH289 13	97	0.0297523	0.00121862	0.282719	2.18528e-05	0.282717	0.170284	0.7	760.473	-0.963295
08JH289 14	97	0.0361033	0.00147407	0.282672	2.05377e-05	0.282669	-1.51269	0.7	833.102	-0.9556
08JH289 15	97	0.0339987	0.00152812	0.282699	1.9233e-05	0.282696	-0.540239	0.7	794.797	-0.953972
08JH289 16	97	0.0388423	0.00158531	0.282734	2.0937e-05	0.282731	0.690242	0.7	745.93	-0.95225
08JH289 17	97	0.0455874	0.00175666	0.282701	1.82839e-05	0.282697	-0.506485	0.7	797.745	-0.947089
08JH289 18	97	0.0405314	0.00160075	0.282709	1.87015e-05	0.282705	-0.220566	0.7	783.189	-0.951785
08JH289 19	97	0.059903	0.00254663	0.282719	2.09777e-05	0.282714	0.0983821	0.7	787.887	-0.923294
08JH289 20	97	0.0317235	0.00130424	0.282715	2.02928e-05	0.282712	0.0257417	0.7	767.818	-0.960716
08jh290 01	97	0.0307656	0.00128599	0.282686	1.68692e-05	0.282683	-1.00318	0.7	808.902	-0.961266
08JH290 02	97	0.030847	0.00125912	0.282663	1.58429e-05	0.28266	-1.82178	0.7	841.291	-0.962075
08JH290 04	97	0.0377809	0.00152407	0.282706	2.06405e-05	0.282703	-0.290003	0.7	784.584	-0.954094
08JH290 05	97	0.0304559	0.00125847	0.282691	1.42591e-05	0.282688	-0.824777	0.7	801.205	-0.962094
08JH290 06	97	0.0205477	0.00088796	0.282641	1.97039e-05	0.282639	-2.55702	0.7	863.222	-0.973254
08JH290 07	97	0.0289872	0.00121909	0.282634	2.16134e-05	0.282632	-2.82637	0.7	880.801	-0.963281
08JH290 08	97	0.0395991	0.00166937	0.282627	1.77983e-05	0.282623	-3.12071	0.7	902.284	-0.949718
08JH290 09	97	0.0335166	0.00141073	0.282665	2.00101e-05	0.282662	-1.75435	0.7	841.6	-0.957508
08JH290 10	97	0.0327759	0.00135719	0.282686	1.9416e-05	0.282684	-0.986473	0.7	809.588	-0.959121
08JH290 11	97	0.0341647	0.00149229	0.282675	1.89711e-05	0.282672	-1.39452	0.7	828.684	-0.955052
08JH290 12	97	0.0290539	0.0011838	0.282715	2.01235e-05	0.282712	0.0182077	0.7	765.963	-0.964343
08JH290 13	97	0.0431095	0.00172703	0.282686	2.27739e-05	0.282683	-1.02813	0.7	818.422	-0.947981
08JH290 14	97	0.0374542	0.0015833	0.282647	1.5077e-05	0.282644	-2.4027	0.7	871.337	-0.95231
08JH290 15	97	0.0325742	0.00132809	0.282664	1.99701e-05	0.282661	-1.79175	0.7	841.457	-0.959997
08JH290 16	97	0.0279189	0.00118364	0.282688	2.34965e-05	0.282686	-0.904589	0.7	803.001	-0.964348
08JH290 17	97	0.0401773	0.00168605	0.282707	1.89849e-05	0.282703	-0.296359	0.7	787.857	-0.949215
08JH290 18	97	0.0394447	0.00175112	0.282701	1.75383e-05	0.282697	-0.507673	0.7	797.688	-0.947255
08JH290 19	97	0.0259366	0.00115754	0.282713	1.68963e-05	0.282711	-0.0410595	0.7	767.872	-0.965134
08JH290 20	97	0.0284467	0.0012133	0.28272	2.11939e-05	0.282717	0.205359	0.731084	758.969	-0.963455
Oxygen standard
Sample	δ18O	2σ
Penglai-1@1	5.10393	0.24037
Penglai-1@2	5.3674	0.256099
Penglai-1@3	5.467	0.336576
Penglai-1@4	5.09898	0.272868
Penglai-1@5	5.56486	0.203503
Penglai-1@6	5.11366	0.228164
Penglai-1@8	5.03566	0.181075
Penglai-1@9	5.68249	0.243972
Penglai-1@11	5.26601	0.173838
Penglai-1@11-1	5.44885	0.325071
Penglai-1@11-2	5.49155	0.219802
Penglai-1@11-3	5.39616	0.265928
Penglai-1@11-4	4.64853	0.202747
Penglai-1@12	5.33466	0.291336
Penglai-1@13	5.49698	0.239696
Penglai-1@14	5.65096	0.271334
Penglai-1@15	4.93231	0.298093
91500@1	10.8814	0.168677
91500@2	10.0703	0.270226
91500@3	9.88445	0.202587
91500@4	10.0152	0.338413
91500@5	10.3509	0.174258
91500@6	10.3102	0.197833
Hf isotope standard
Sample		176Yb/177Hf(corr)	176Lu/177Hf(corr)	176Hf/177Hf(corr)	2σ
91500 01		0.00943332	0.000317183	0.282277	1.70563e-05
91500 02		0.00934395	0.0003165	0.282287	1.65939e-05
91500 03		0.00939771	0.000319574	0.28231	1.60745e-05
91500 04		0.00973232	0.000330848	0.282296	1.16889e-05
91500 05		0.0102151	0.00034792	0.282294	1.38418e-05
91500 06		0.0100318	0.000340631	0.282283	1.35511e-05
91500 07		0.00953765	0.000328378	0.282277	1.46908e-05
91500 08		0.00977594	0.000333477	0.282285	1.40976e-05
91500 09		0.00970292	0.000328496	0.28229	1.35852e-05
91500 10		0.00963461	0.000328283	0.282296	1.36772e-05
91500 11		0.00912662	0.000317611	0.282283	1.61596e-05
91500 12		0.0091636	0.000316328	0.282297	1.51236e-05
91500 13		0.00971529	0.000330454	0.282283	1.46209e-05
91500 14		0.00967334	0.000332088	0.282304	1.60782e-05
91500 15		0.00974946	0.000337664	0.28229	1.46377e-05
91500 16		0.00948185	0.000327611	0.282309	1.52171e-05
91500 17		0.00941763	0.000324174	0.282294	1.46431e-05
91500 18		0.00948416	0.000326271	0.282289	1.54508e-05
91500 19		0.0094208	0.000325143	0.282273	1.48233e-05
91500 20		0.00948927	0.000327563	0.282301	1.37819e-05
GJ-1 01		0.00648735	0.000239437	0.28203	1.5725e-05
GJ-1 02		0.00728566	0.000265217	0.282009	1.54999e-05
GJ-1 03		0.00760789	0.000272897	0.282016	1.68621e-05
GJ-1 05		0.00718563	0.000258726	0.282014	1.48444e-05
GJ-1 06		0.00702939	0.000253892	0.282008	1.36302e-05
GJ-1 07		0.00710587	0.000255861	0.282007	1.29422e-05
GJ-1 08		0.00658427	0.000240256	0.282001	1.36065e-05
GJ-1 09		0.00734875	0.000263372	0.282005	1.40387e-05
GJ-1 10		0.00726334	0.000264495	0.282018	1.45734e-05
GJ-1 11		0.00708352	0.000255675	0.282018	1.4906e-05
GJ-1 12		0.00743322	0.000263776	0.282013	1.30885e-05
GJ-1 13		0.00754069	0.00027265	0.282027	2.08169e-05
GJ-1 14		0.00728098	0.000260351	0.28201	1.43086e-05
GJ-1 15		0.00740281	0.000263732	0.28201	1.37416e-05
GJ-1 16		0.00711806	0.00025654	0.282019	1.19702e-05
GJ-1 17		0.00726784	0.000259199	0.282008	1.48655e-05
GJ-1 18		0.00727294	0.000259503	0.28199	1.35873e-05
GJ-1 19		0.00726188	0.000261219	0.282	1.46566e-05
GJ-1 20		0.00693343	0.000250664	0.282045	1.33988e-05
